# Supplementary material for: Variability of Prognostic Communication in Critically Ill Neurologic Patients: A Pilot Multicenter Mixed-Methods Study
Source: PubMed Central journal article supplement — Crit Care Explor. 2022 Feb 21;4(2):e0640. doi: 10.1097/CCE.0000000000000640 (PMC8863127; doi:10.1097/cce.0000000000000640), 2022-02-21
Supplement: cc9-4-e0640-s002.pdf [file cc9-4-e0640-s002.pdf]

### Supplementary Table 1: Participant characteristics

\*Abbreviations: Full= Full Code; DNR= Do not resuscitate; DNI = Do not intubate.

\*\*Center A-F = medical or medical-surgical ICUs; Center G = neuroICU

| Characteristic                     | Patients (N=39) | Family members (N=77) | Clinicians (N=27) |
|------------------------------------|-----------------|-----------------------|-------------------|
| Sex:                               |                 |                       |                   |
| Male                               | 24 (61.5)       | 27 (37.0)             | 19 (70.4)         |
| Female                             | 15 (38.5)       | 46 (63.0)             | 8 (29.6)          |
| Race/ethnicity:                    |                 |                       |                   |
| Non-Hispanic White                 | 33 (84.6)       | 59 (83.1)             | 21 (77.8)         |
| Hispanic White                     | 3 (7.7)         | 1 (1.4)               | 1 (4.6)           |
| Asian                              | 1 (2.6)         | 2 (2.8)               | 3 (11.1)          |
| Black                              | 2 (5.1)         | 7 (9.9)               | 2 (7.4)           |
| Native American                    | 0 (0.0)         | 1 (1.4)               | 0 (0.0)           |
| Other                              | 0 (0.0)         | 1 (1.4)               | 0 (0.0)           |
| Missing                            |                 | 6                     |                   |
| Mean Age ( $\pm$ SD) (years)       | 59.4 $\pm$ 19.9 | 49.4 $\pm$ 16.7       | 43.3 $\pm$ 10.8   |
| Educational level:                 |                 |                       |                   |
| Less than high school              |                 | 4 (5.6)               |                   |
| High school / GED                  |                 | 22 (31.0)             |                   |
| Some college                       |                 | 18 (25.4)             |                   |
| Technical school                   |                 | 3 (4.2)               |                   |
| College graduate                   |                 | 14 (19.7)             |                   |
| Professional degree                |                 | 10 (14.1)             |                   |
| Missing                            |                 | 6                     |                   |
| Code status at enrollment: *       |                 |                       |                   |
| Full                               | 34 (87.2)       |                       |                   |
| DNI                                | 1 (2.6)         |                       |                   |
| DNR                                | 1 (2.6)         |                       |                   |
| DNI/DNR                            | 3 (7.7)         |                       |                   |
| Diagnosis:                         |                 |                       |                   |
| Acute ischemic stroke              | 11 (28.2)       |                       |                   |
| Hemorrhagic stroke                 | 4 (10.3)        |                       |                   |
| Aneurysmal subarachnoid hemorrhage | 6 (15.4)        |                       |                   |
| Traumatic brain injury             | 13 (33.3)       |                       |                   |
| Status epilepticus                 | 1 (2.6)         |                       |                   |
| Encephalitis /                     | 2 (5.1)         |                       |                   |

|                                    |           |           |                 |
|------------------------------------|-----------|-----------|-----------------|
| meningitis                         |           |           |                 |
| Neoplasm                           | 1 (2.6)   |           |                 |
| Drug overdose                      | 1 (2.6)   |           |                 |
| Mean years of practice ( $\pm$ SD) |           |           | 13.2 $\pm$ 11.4 |
| Staff position:                    |           |           |                 |
| Attending                          |           |           | 15 (75.5)       |
| Fellow or Resident                 |           |           | 7 (25.9)        |
| Other                              |           |           | 1 (4.0)         |
| Missing                            |           |           | 4 (14.8)        |
| Specialty:                         |           |           |                 |
| Internal medicine                  |           |           | 10 (37.0)       |
| Neurocritical care                 |           |           | 4 (14.8)        |
| Surgery                            |           |           | 7 (31.8)        |
| Neurosurgery                       |           |           | 1(3.7)          |
| Palliative Care                    |           |           | 1(3.7)          |
| Neurology                          |           |           | 1(3.7)          |
| Other                              |           |           | 3(11.1)         |
| Center: **                         |           |           |                 |
| A                                  | 3 (7.7)   | 4 (5.2)   | 3 (11.1)        |
| B                                  | 3 (7.7)   | 7 (9.1)   | 3 (11.1)        |
| C                                  | 2 (5.1)   | 6 (7.8)   | 2 (7.4)         |
| D                                  | 1 (2.6)   | 1 (1.3)   | 1 (3.7)         |
| E                                  | 3 (7.7)   | 6 (7.8)   | 3 (11.1)        |
| F                                  | 9 (23.1)  | 17 (22.1) | 7 (25.9)        |
| G                                  | 18 (46.2) | 36 (46.8) | 8 (29.6)        |
