# Supplementary material for: Variability of Prognostic Communication in Critically Ill Neurologic Patients: A Pilot Multicenter Mixed-Methods Study
Source: PubMed Central journal article supplement — Crit Care Explor. 2022 Feb 21;4(2):e0640. doi: 10.1097/CCE.0000000000000640 (PMC8863127; doi:10.1097/cce.0000000000000640), 2022-02-21
Supplement: cc9-4-e0640-s003.pdf [file cc9-4-e0640-s003.pdf]

**Supplementary Table 5: Clinician characteristics by specialty**

| Characteristic                        | Internal<br>Medicine<br>(N=10) | Neuro<br>critical<br>Care<br>(N=4) | Surgery<br>(N=7) | Neurosurgery<br>(N=1) | Palliative<br>Care<br>(N=1) | General<br>Neurology<br>(N=1) | Other<br>(N=3) |
|---------------------------------------|--------------------------------|------------------------------------|------------------|-----------------------|-----------------------------|-------------------------------|----------------|
| Sex:                                  |                                |                                    |                  |                       |                             |                               |                |
| Male                                  | 8                              | 2                                  | 6                | 0                     | 0                           | 0                             | 1              |
| Female                                | 2                              | 2                                  | 1                | 1                     | 1                           | 1                             | 2              |
| Race/ethnicity:                       |                                |                                    |                  |                       |                             |                               |                |
| Non-Hispanic<br>White                 | 10                             | 3                                  | 5                | 1                     | 1                           | 0                             | 1              |
| Hispanic<br>White                     | 0                              | 0                                  | 0                | 0                     | 0                           | 1                             | 0              |
| Asian                                 | 0                              | 1                                  | 1                | 0                     | 0                           | 0                             | 1              |
| Black                                 | 0                              | 0                                  | 1                | 0                     | 0                           | 0                             | 1              |
| Native<br>American                    | 0                              | 0                                  | 0                | 0                     | 0                           | 0                             | 0              |
| Other                                 | 0                              | 0                                  | 0                | 0                     | 0                           | 0                             | 0              |
| Mean Age<br>( $\pm$ SD) (years)       | 39 $\pm$ 7                     | 44 $\pm$ 5                         | 47 $\pm$ 11      | 66                    | 61                          | 29                            | 39 $\pm$<br>14 |
| Mean years of<br>practice ( $\pm$ SD) | 9 $\pm$ 7                      | 17 $\pm$ 6                         | 14 $\pm$ 14      | 40                    | 19                          | 3                             | 12 $\pm$<br>17 |
| Staff position:                       |                                |                                    |                  |                       |                             |                               |                |
| Attending                             | 5                              | 4                                  | 4                | 1                     | 1                           | 0                             | 0              |
| Resident or<br>Fellow                 | 2                              | 0                                  | 2                | 0                     | 0                           | 1                             | 2              |
| Other                                 | 0                              | 0                                  | 0                | 0                     | 0                           | 0                             | 1              |
| Missing                               | 3                              | 0                                  | 1                | 0                     | 0                           | 0                             | 0              |
