# Supplementary material for: Variability of Prognostic Communication in Critically Ill Neurologic Patients: A Pilot Multicenter Mixed-Methods Study
Source: PubMed Central journal article supplement — Crit Care Explor. 2022 Feb 21;4(2):e0640. doi: 10.1097/CCE.0000000000000640 (PMC8863127; doi:10.1097/cce.0000000000000640), 2022-02-21
Supplement: cc9-4-e0640-s004.pdf [file cc9-4-e0640-s004.pdf]

## **SUPPLEMENTARY RESULTS**

### *Clinicians leading multiple clinician-family meetings*

Six of 27 total clinicians led more than one meeting. Two clinicians from cohort 1 led 2 meetings each, while four clinicians from cohort 2 each led between 2-8 meetings, likely because this center recorded from one neuro-specialized ICU. Clinicians who led more than one clinician-family meeting tended to repeat prognostic communication approaches (Supplementary Figure). Three clinicians used the Advisory approach more often than any other approaches. Two clinicians used either exclusively the Informative or the Responsive approaches. Only one clinician used two different approaches for the two meetings they led.
