# Supplementary material for: Variability of Prognostic Communication in Critically Ill Neurologic Patients: A Pilot Multicenter Mixed-Methods Study
Source: PubMed Central journal article supplement — Crit Care Explor. 2022 Feb 21;4(2):e0640. doi: 10.1097/CCE.0000000000000640 (PMC8863127; doi:10.1097/cce.0000000000000640), 2022-02-21
Supplement: cc9-4-e0640-s006.pdf [file cc9-4-e0640-s006.pdf]

**Supplementary Table 2: Univariate associations of clinicians, patient, meeting and family characteristics with prognostic communication approaches**

<sup>(a)</sup>Not accounting for any clustering within center, clinician, or patient/family;  $p < 0.05$  considered statistically significant. Fisher's exact test for categorical characteristics, exact Kruskal-Wallis test for continuous characteristics

|                                  | % (N) or Median (IQR) within approach |                 |                  |                      | p-value <sup>(a)</sup> |
|----------------------------------|---------------------------------------|-----------------|------------------|----------------------|------------------------|
|                                  | Authoritative (N=9)                   | Advisory (N=18) | Responsive (N=6) | Informational (N=10) |                        |
| <b>Clinician characteristics</b> |                                       |                 |                  |                      |                        |
| Center:                          |                                       |                 |                  |                      | <0.001                 |
| A                                | 11.1 (1)                              | 11.1 (2)        | 0.0 (0)          | 0.0 (0)              |                        |
| B                                | 11.1 (1)                              | 0.0 (0)         | 16.7 (1)         | 10.0 (1)             |                        |
| C                                | 11.1 (1)                              | 0.0 (0)         | 0.0 (0)          | 10.0 (1)             |                        |
| D                                | 0.0 (0)                               | 5.6 (1)         | 0.0 (0)          | 0.0 (0)              |                        |
| E                                | 0.0 (0)                               | 5.6 (1)         | 0.0 (0)          | 20.0 (2)             |                        |
| F                                | 22.2 (2)                              | 5.6 (1)         | 0.0 (0)          | 60.0 (6)             |                        |
| G                                | 44.4 (4)                              | 72.2 (13)       | 83.3 (5)         | 0.0 (0)              |                        |
| Sex:                             |                                       |                 |                  |                      | 0.22                   |
| Male                             | 55.6 (5)                              | 38.9 (7)        | 50.0 (3)         | 80.0 (8)             |                        |
| Female                           | 44.4 (4)                              | 61.1 (11)       | 50.0 (3)         | 20.0 (2)             |                        |
| Race/ethnicity:                  |                                       |                 |                  |                      | 0.75                   |
| Non-Hispanic White               | 77.8 (7)                              | 77.8 (14)       | 83.3 (5)         | 90.0 (9)             |                        |
| Hispanic White                   | 0.0 (0)                               | 5.6 (1)         | 0.0 (0)          | 0.0 (0)              |                        |
| Asian                            | 11.1 (1)                              | 16.7 (3)        | 16.7 (1)         | 0.0 (0)              |                        |
| Black                            | 11.1 (1)                              | 0.0 (0)         | 0.0 (0)          | 10.0 (1)             |                        |
| Median Age (IQR) (years)         | 37 (36, 45)                           | 44 (37, 49)     | 37 (31, 61)      | 42 (41, 46)          | 0.82                   |
| Median years in practice (IQR)   | 9 (6, 17)                             | 16.5 (9, 20)    | 9 (4, 19)        | 10.5 (6, 15)         | 0.63                   |
| Training:                        |                                       |                 |                  |                      | 0.50                   |
| Attending                        | 88.9 (8)                              | 88.9 (16)       | 66.7 (4)         | 70.0 (7)             |                        |
| Fellow                           | 0.0 (0)                               | 5.6 (1)         | 0.0 (0)          | 10.0 (1)             |                        |
| Resident                         | 11.1 (1)                              | 5.6 (1)         | 33.3 (2)         | 10.0 (1)             |                        |
| Other                            | 0.0 (0)                               | 0.0 (0)         | 0.0 (0)          | 10.0 (1)             |                        |
| Neuro-intensivist:               |                                       |                 |                  |                      | 0.01                   |
| No                               | 66.7 (6)                              | 27.8 (5)        | 66.7 (4)         | 90.0 (9)             |                        |

|                                    |             |               |             |               |       |
|------------------------------------|-------------|---------------|-------------|---------------|-------|
| Yes                                | 33.3 (3)    | 72.2 (13)     | 33.3 (2)    | 10.0 (1)      |       |
| <b>Patient characteristics</b>     |             |               |             |               |       |
| Sex:                               |             |               |             |               | 0.35  |
| Male                               | 44.4 (4)    | 61.1 (11)     | 83.3 (5)    | 80.0 (8)      |       |
| Female                             | 55.6 (5)    | 38.9 (7)      | 16.7 (1)    | 20.0 (2)      |       |
| Race/ethnicity:                    |             |               |             |               | 0.33  |
| Non-Hispanic White                 | 88.9 (8)    | 66.7 (12)     | 83.3 (5)    | 90.0 (9)      |       |
| Hispanic White                     | 0.0 (0)     | 16.7 (3)      | 0.0 (0)     | 0.0 (0)       |       |
| Asian                              | 0.0 (0)     | 16.7 (3)      | 16.7 (1)    | 0.0 (0)       |       |
| Black                              | 11.1 (1)    | 0.0 (0)       | 0.0 (0)     | 10.0 (1)      |       |
| Median Age (IQR) (years)           | 51 (24, 67) | 73.5 (58, 82) | 67 (58, 80) | 58.5 (52, 67) | 0.07  |
| Primary neurologic diagnosis:      |             |               |             |               | 0.059 |
| Acute ischemic stroke              | 22.2 (2)    | 50.0 (9)      | 66.7 (4)    | 0.0 (0)       |       |
| Hemorrhagic stroke                 | 11.1 (1)    | 11.1 (2)      | 0.0 (0)     | 10.0 (1)      |       |
| Aneurysmal subarachnoid hemorrhage | 11.1 (1)    | 5.6 (1)       | 0.0 (0)     | 40.0 (4)      |       |
| Traumatic brain injury             | 44.4 (4)    | 16.7 (3)      | 33.3 (2)    | 40.0 (4)      |       |
| Status epilepticus                 | 11.1 (1)    | 0.0 (0)       | 0.0 (0)     | 0.0 (0)       |       |
| Encephalitic / meningitis          | 0.0 (0)     | 11.1 (2)      | .0 (0)      | 0.0 (1)       |       |
| Neoplasm                           | 0.0 (0)     | 0.0 (0)       | 0.0 (0)     | 10.0 (1)      |       |
| Drug overdose                      | 0.0 (0)     | 5.6 (1)       | 0.0 (0)     | 0.0 (0)       |       |
| Primary neurologic diagnosis:      |             |               |             |               | .07   |
| Acute ischemic stroke              | 22.2 (2)    | 50.0 (9)      | 66.7 (4)    | 0.0 (0)       |       |
| Traumatic brain injury             | 44.4 (4)    | 16.7 (3)      | 33.3 (2)    | 40.0 (4)      |       |
| Hemorrhagic stroke                 | 11.1 (1)    | 11.1 (2)      | 0.0 (0)     | 10.0 (1)      |       |
| Other                              | 22.2 (2)    | 22.2 (4)      | 0.0 (0)     | 50.0 (5)      |       |
| <b>Family characteristics</b>      |             |               |             |               |       |
| Number of family members present:  |             |               |             |               | 0.52  |
| 1                                  | 44.4 (4)    | 66.7 (12)     | 50.0 (3)    | 40.0 (4)      |       |

|                                                       |                 |               |               |                 |      |
|-------------------------------------------------------|-----------------|---------------|---------------|-----------------|------|
| 2                                                     | 11.1 (1)        | 16.7 (3)      | 33.3 (2)      | 40.0 (4)        |      |
| 3 – 5                                                 | 44.4 (4)        | 16.7 (3)      | 16.7 (1)      | 20.0 (2)        |      |
| Maximum educational level:                            |                 |               |               |                 | 0.52 |
| ≤ High school                                         | 212.5(1)        | 6.7 (1)       | 20.0 (1)      | 20.0 (2)        |      |
| Some college / technical                              | 25.0 (2)        | 53.3 (8)      | 20.0 (1)      | 30.0 (3)        |      |
| College                                               | 50.0 (4)        | 13.3 (2)      | 20.0 (1)      | 10.0 (1)        |      |
| Post-graduate                                         | 12.5 (1)        | 26.7 (4)      | 40.0 (2)      | 40.0 (4)        |      |
| Sex                                                   |                 |               |               |                 | 0.85 |
| All female                                            | 33.3 (3)        | 40.0 (6)      | 40.0 (2)      | 50.0 (5)        |      |
| Mix of male, female                                   | 55.6 (5)        | 26.7 (4)      | 40.0 (2)      | 30.0 (3)        |      |
| All male                                              | 11.1 (1)        | 33.3 (4)      | 20.0 (1)      | 20.0 (2)        |      |
| Race/ethnicity:                                       |                 |               |               |                 | 0.8  |
| All non-Hispanic White                                | 62.5 (5)        | 64.3 (9)      | 60.0 (3)      | 980.0 (8)       |      |
| Other                                                 | 37.5 (3)        | 35.7 (5)      | 40.0 (2)      | 20.0 (2)        |      |
| Median Age (IQR) (years)                              | 48.5 (37.3, 56) | 49 (42, 57)   | 51 (45, 60.5) | 48.5 (41, 51.5) | 0.88 |
| <b>Meeting characteristics</b>                        |                 |               |               |                 |      |
| Meeting length (minutes)                              | 30 (19, 38)     | 33.5 (23, 52) | 36.5 (28, 51) | 18.5 (15, 24)   | 0.03 |
| Median number of days from admission to meeting (IQR) | 8 (3, 9)        | 4.5 (3, 9)    | 6 (4, 11)     | 5 (4, 9)        | 0.93 |
| First meeting:                                        |                 |               |               |                 | 0.33 |
| Yes                                                   | 100.0 (9)       | 83.3 (15)     | 3.3 (5)       | 100.0 (10)      |      |
| No                                                    | 0 (0)           | 16.7 (3)      | 16.7 (1)      | 0 (0)           |      |
