# Supplementary material for: Variability of Prognostic Communication in Critically Ill Neurologic Patients: A Pilot Multicenter Mixed-Methods Study
Source: PubMed Central journal article supplement — Crit Care Explor. 2022 Feb 21;4(2):e0640. doi: 10.1097/CCE.0000000000000640 (PMC8863127; doi:10.1097/cce.0000000000000640), 2022-02-21
Supplement: cc9-4-e0640-s007.pdf [file cc9-4-e0640-s007.pdf]

**Supplementary Table 3: Univariate associations of clinicians' prognostic communication approach, clinician characteristics, and patient characteristics with goals of care decision**

<sup>(a)</sup>Not accounting for any clustering within center or clinician

|                                   | % (N) within decision                                 |              | p-value <sup>(a)</sup> |
|-----------------------------------|-------------------------------------------------------|--------------|------------------------|
|                                   | no WOLST<br>(continuation of<br>care/survival) (N=23) | WOLST (N=16) |                        |
| <b>Approach</b>                   |                                                       |              | 0.198                  |
| Authoritative                     | 21.7 (5)                                              | 25.0 (4)     |                        |
| Advisory                          | 26.1 (6)                                              | 56.3 (9)     |                        |
| Responsive                        | 17.4 (4)                                              | 6.3 (1)      |                        |
| Informational                     | 34.8 (8)                                              | 12.5 (2)     |                        |
| <b>Center</b>                     |                                                       |              | 0.86                   |
| A                                 | 8.7 (2)                                               | 6.3 (1)      |                        |
| B                                 | 8.7 (2)                                               | 6.3 (1)      |                        |
| C                                 | 4.4 (1)                                               | 6.3 (1)      |                        |
| D                                 | 4.4 (1)                                               | 0.0 (0)      |                        |
| E                                 | 13.0 (3)                                              | 0.0 (0)      |                        |
| F                                 | 21.7 (5)                                              | 25.0 (4)     |                        |
| G                                 | 39.1 (9)                                              | 56.3 (9)     |                        |
| <b>Clinician characteristics:</b> |                                                       |              |                        |
| Neuro-intensivist (Specialty)     | 30.4 (7)                                              | 56.3 (9)     | 0.19                   |
| Sex:                              |                                                       |              | 1                      |
| Female                            | 47.8 (11)                                             | 43.8 (7)     |                        |
| Male                              | 52.2 (12)                                             | 56.3 (9)     |                        |
| Race/ethnicity:                   |                                                       |              | 1                      |
| Non-Hispanic White                | 82.6 (19)                                             | 81.3 (13)    |                        |
| Other                             | 17.4 (4)                                              | 18.8 (3)     |                        |
| Median Age (IQR) (years)          | 41 (37, 45)                                           | 44 (37, 49)  | 0.24                   |
| Median years in practice (IQR)    | 9 (6, 16)                                             | 16 (9, 21.5) | 0.07                   |
| Attending physician               | 73.9 (17)                                             | 93.8 (15)    | 0.21                   |
| <b>Patient characteristics:</b>   |                                                       |              |                        |
| Primary neurologic diagnosis:     |                                                       |              | 1                      |
| Acute ischemic stroke             | 26.1 (6)                                              | 31.3 (5)     |                        |
| Traumatic brain injury            | 34.8 (8)                                              | 31.3 (5)     |                        |
| Hemorrhagic stroke                | 8.7 (2)                                               | 12.5 (2)     |                        |

|                                      |                 |               |       |
|--------------------------------------|-----------------|---------------|-------|
| Other                                | 30.4 (7)        | 25.0 (4)      |       |
| Sex:                                 |                 |               | 0.74  |
| Male                                 | 65.2 (15)       | 56.3 (9)      |       |
| Female                               | 34.8 (8)        | 43.8 (7)      |       |
| Race/ethnicity:                      |                 |               | 0.87  |
| Non-Hispanic White                   | 87.0 (20)       | 81.3 (13)     |       |
| Hispanic White                       | 4.4 (1)         | 12.5 (2)      |       |
| Asian                                | 4.4 (1)         | 0.0 (0)       |       |
| Black                                | 4.4 (1)         | 6.3 (1)       |       |
| Median Age (IQR)<br>(years)          | 52 (43, 67)     | 74.5 (62, 85) | 0.003 |
| <b>Family characteristics:</b>       |                 |               |       |
| Number of family<br>members present: |                 |               | 0.65  |
| 1                                    | 47.8 (11)       | 50.0 (8)      |       |
| 2                                    | 30.4 (7)        | 18.8 (3)      |       |
| 3 – 5                                | 21.7 (5)        | 31.3 (5)      |       |
| Maximum educational<br>level:        |                 |               | 0.13  |
| ≤ high school                        | 25.0 (5)        | 0.0 (0)       |       |
| Some college /<br>technical          | 25.0 (5)        | 57.1 (8)      |       |
| College                              | 25.0 (5)        | 21.4 (3)      |       |
| Post-graduate                        | 25.0 (5)        | 21.4 (3)      |       |
| Sex:                                 |                 |               | 0.75  |
| All female                           | 42.9 (9)        | 28.6 (4)      |       |
| Mix of male, female                  | 38.1 (8)        | 42.9 (6)      |       |
| All male                             | 19.1 (4)        | 28.6 (4)      |       |
| Race/ethnicity:                      |                 |               | 1     |
| All non-Hispanic<br>White            | 75.0 (15)       | 69.2 (9)      |       |
| Other                                | 25.0 (5)        | 30.8 (4)      |       |
| Median Age (IQR)<br>(years)          | 49.5 (43.8, 55) | 54 (41, 63)   | 0.40  |
