# Supplementary material for: Variability of Prognostic Communication in Critically Ill Neurologic Patients: A Pilot Multicenter Mixed-Methods Study
Source: PubMed Central journal article supplement — Crit Care Explor. 2022 Feb 21;4(2):e0640. doi: 10.1097/CCE.0000000000000640 (PMC8863127; doi:10.1097/cce.0000000000000640), 2022-02-21
Supplement: cc9-4-e0640-s008.pdf [file cc9-4-e0640-s008.pdf]

**Supplementary Table 4: Multivariable analyses for WOLST decision**

|                              | <b>Odds Ratio (95% CI), WOLST vs.no WOLST</b> | <b>Overall p-value</b> |
|------------------------------|-----------------------------------------------|------------------------|
| Approach:                    |                                               | 0.21                   |
| Authoritative                | 1.24 (0.16, 9.43)                             |                        |
| Advisory                     | Reference                                     |                        |
| Responsive                   | 0.13 (0.01, 1.84)                             |                        |
| Informational                | 1.06 (1.01, 1.11)                             |                        |
| Patient age, 1-year increase | 1.06 (1.01, 1.11)                             | 0.02                   |
