# Supplementary figures and images for: Variability of Prognostic Communication in Critically Ill Neurologic Patients: A Pilot Multicenter Mixed-Methods Study
Source: PubMed Central journal article supplement — Crit Care Explor. 2022 Feb 21;4(2):e0640. doi: 10.1097/CCE.0000000000000640 (PMC8863127; doi:10.1097/cce.0000000000000640), 2022-02-21

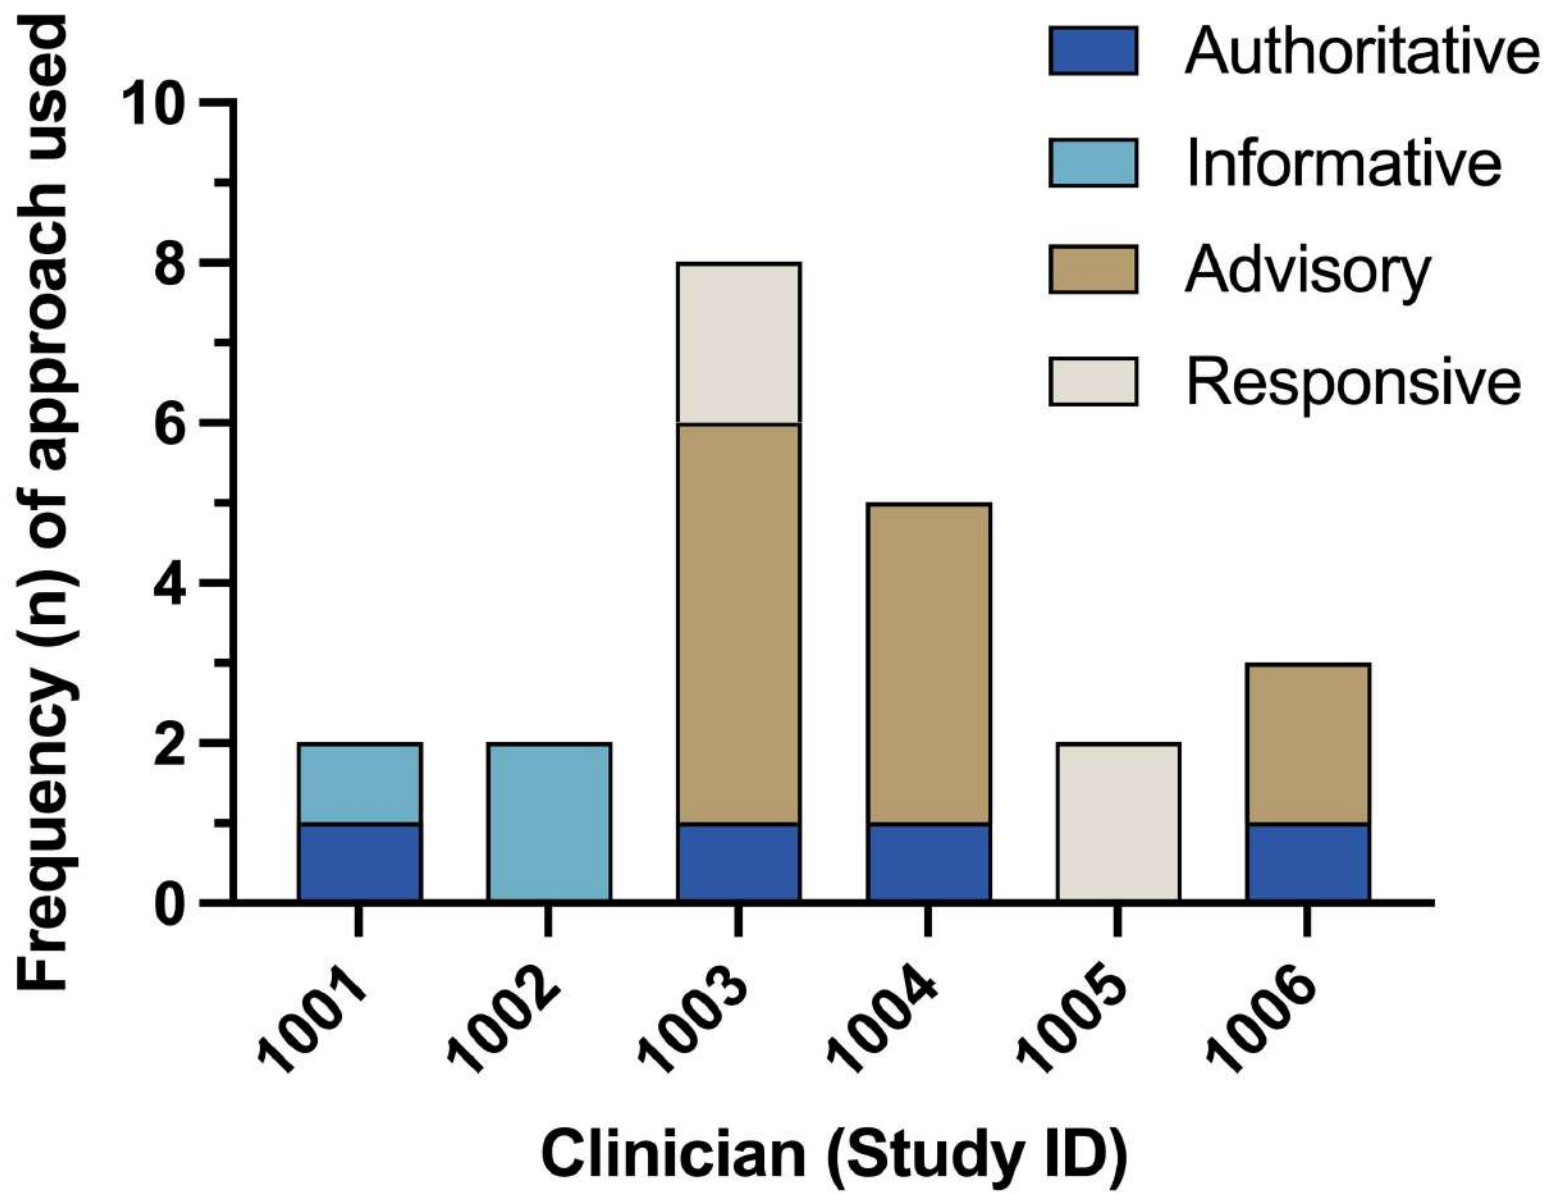

Supplement: cc9-4-e0640-s005.pdf [file cc9-4-e0640-s005.pdf]
